# Supplementary material
Source: PubMed Central journal article supplement (PMC7001422)
Supplement: Supp_TableS1.pdf [file Supp_TableS1.pdf]

## Supplementary Data

SUPPLEMENTARY TABLE S1.  
DEMOGRAPHIC CHARACTERISTICS

|                                                       |            |
|-------------------------------------------------------|------------|
| Patients ( <i>n</i> )                                 | 261        |
| Age at diagnosis (mean ± SD), years                   | 9.6 ± 4.0  |
| Age group at diagnosis, <i>n</i> (%), years           |            |
| ≤6                                                    | 59 (22.6)  |
| 6 to <13                                              | 154 (59.0) |
| 13 to <18                                             | 48 (18.4)  |
| Sex, <i>n</i> (%)                                     |            |
| Female                                                | 131 (50.2) |
| Male                                                  | 130 (49.8) |
| Race, <i>n</i> (%)                                    |            |
| NHW                                                   | 114 (43.7) |
| NHB                                                   | 4 (1.5)    |
| Hispanic                                              | 64 (24.5)  |
| Asian and Pacific Islander                            | 29 (11.1)  |
| AIAN                                                  | 1 (0.4)    |
| Unknown                                               | 49 (18.8)  |
| Insurance type, <i>n</i> (%)                          |            |
| Private                                               | 194 (74.3) |
| Public                                                | 65 (24.9)  |
| Unknown                                               | 2 (0.8)    |
| First A1c (mean ± SD), %                              | 10.8 ± 2.5 |
| A1c at 0 months (mean ± SD)                           | 11.4 ± 2.2 |
| A1c at 18 months (mean ± SD)                          | 8.2 ± 1.9  |
| Max A1c post nadir (mean ± SD)                        | 8.4 ± 1.8  |
| Time to Max A1c post nadir in months<br>(mean ± SD)   | 13.3 ± 3.6 |
| Pump use within 18 month post diagnosis, <i>n</i> (%) |            |
| Yes                                                   | 105 (40.2) |
| No                                                    | 156 (59.8) |
| CGM use within 18 months post diagnosis, <i>n</i> (%) |            |
| Yes                                                   | 108 (41.4) |
| No                                                    | 153 (58.6) |

AIAN, American Indian or Alaska Native; CGM, continuous glucose monitor; NHB, non-Hispanic black; NHW, non-Hispanic white.
