# Supplementary material
Source: PubMed Central journal article supplement (PMC7001422)
Supplement: Supp_TableS2.pdf [file Supp_TableS2.pdf]

SUPPLEMENTARY TABLE S2. OBSERVED HEMOGLOBIN A1C BASED ON DEMOGRAPHIC FACTORS

|                              | <i>Observed HbA1c at onset<br/>Mean ± SD</i> | <i>Observed HbA1c at nadir<br/>Mean ± SD</i> | <i>Observed HbA1c at 18 months<br/>Mean ± SD</i> |
|------------------------------|----------------------------------------------|----------------------------------------------|--------------------------------------------------|
| Age group (years)            |                                              |                                              |                                                  |
| <6                           | 10.3 ± 1.7                                   | 7.0 ± 1.0                                    | 8.1 ± 1.5                                        |
| 6 to <13                     | 11.4 ± 2.0                                   | 6.7 ± 1.1                                    | 8.3 ± 1.7                                        |
| 13 to <18                    | 10.9 ± 2.4                                   | 6.5 ± 1.2                                    | 8.0 ± 3.3                                        |
| Insurance type               |                                              |                                              |                                                  |
| Private                      | 11.3 ± 2.1                                   | 6.7 ± 1.1                                    | 7.9 ± 1.6                                        |
| Public                       | 11.1 ± 2.0                                   | 6.8 ± 1.0                                    | 8.8 ± 2.3                                        |
| Race                         |                                              |                                              |                                                  |
| Non-Hispanic white           | 10.9 ± 2.0                                   | 6.8 ± 1.1                                    | 7.8 ± 1.2                                        |
| Minority                     | 11.2 ± 2.0                                   | 6.7 ± 1.3                                    | 8.2 ± 2.1                                        |
| Gender                       |                                              |                                              |                                                  |
| Male                         | 10.7 ± 1.8                                   | 6.7 ± 1.0                                    | 8.7 ± 2.1                                        |
| Female                       | 11.4 ± 2.1                                   | 6.8 ± 1.2                                    | 7.7 ± 1.5                                        |
| Insurance type + race        |                                              |                                              |                                                  |
| Private + non-Hispanic white | 10.8 ± 2.1                                   | 6.7 ± 1.1                                    | 7.6 ± 1.0                                        |
| Private + minority           | 11.4 ± 2.0                                   | 6.8 ± 1.3                                    | 7.9 ± 1.5                                        |
| Public + non-Hispanic white  | 11.4 ± 1.6                                   | 7.2 ± 0.8                                    | 8.8 ± 1.6                                        |
| Public + minority            | 11.0 ± 2.0                                   | 7.5 ± 1.1                                    | 8.9 ± 2.6                                        |

HbA1c, hemoglobin A1c.
